# Supplementary material for: A Unique Evolution of the S2 Gene of Equine Infectious Anemia Virus in Hosts Correlated with Particular Infection Statuses
Source: MDPI journal article supplement (doi:10.3390/v6114265), 2014-11-10
Supplement: s1 [file s1]

## Supplementary Materials

### A Unique Evolution of the *S2* Gene of Equine Infectious Anemia Virus in Hosts Correlated with Particular Infection Statuses

Xue-Feng Wang, Shuai Wang, Qiang Liu, Yue-Zhi Lin, Cheng Du, Yan-Dong Tang, Lei Na, Xiaojun Wang and Jian-Hua Zhou

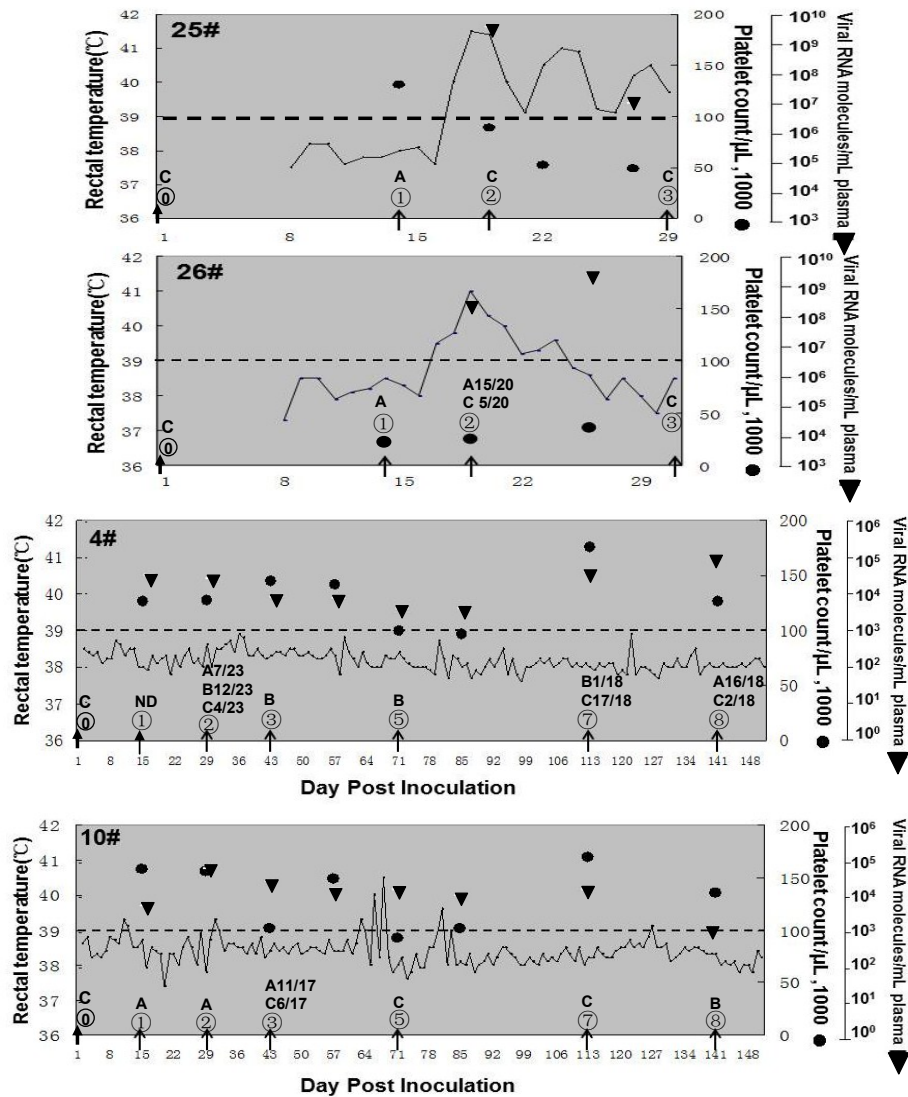

**Figure S1.** The clinical profile of the horses experimentally infected with EIAV<sub>LN40</sub>. The rectal temperature (solid lines, the left Y-axis) and platelet count (spots, the first right Y-axis) and quantitation of the virus load (arrowheads, the second right Y-axis) were monitored at the indicated time points after infection as standard measures of disease. “0” indicates the inoculated point, “1”, “2”, “3”...indicates the sampled point. The letter A, B and C represent the corresponding branch of the phylogenetic tree, respectively. ND indicates not detectable. The febrile episodes were defined by rectal temperatures above 39 °C, in conjunction with a reduction in the platelet counts to below 100,000/μL of whole blood and other characteristic clinical symptoms.

**Table S1.** Differences between S2 sequences derived from samples taken from symptomatic and asymptomatic time points.

| S2 Variation <sup>a</sup> | No. (%) of Occurrences in Time Points of |                                | <i>p</i> value <sup>b</sup> |
|---------------------------|------------------------------------------|--------------------------------|-----------------------------|
|                           | Symptomatic ( <i>n</i> = 106)            | Asymptomatic ( <i>n</i> = 280) |                             |
| 6K/R                      | 0(0)                                     | 58(21)                         | <0.01                       |
| 7G/R                      | 15(14)                                   | 23(8)                          | <i>p</i> > 0.05             |
| 17G/E                     | 0(0)                                     | 8(3)                           | <i>p</i> > 0.05             |
| 18V/I                     | 0(0)                                     | 22(8)                          | <0.01                       |
| 22E/K                     | 0(0)                                     | 65(23)                         | <0.01                       |
| 37K/R                     | 14(13)                                   | 132(47)                        | <0.01                       |
| 39G/E                     | 0(0)                                     | 93(33)                         | <0.01                       |
| 41T/I                     | 15(14)                                   | 175(63)                        | <0.01                       |
| 51T/I                     | 15(14)                                   | 150(54)                        | <0.01                       |
| 55Q/K                     | 15(14)                                   | 225(80)                        | <0.01                       |

<sup>a</sup> Positions are those indicated by red denote in Figure 1; <sup>b</sup> Determined by the chi-square test of the SAS 9.2.

**Table S2.** Differences between S2 sequences derived from the early phase or late phase of EIAV infection.

| S2 Variation <sup>a</sup> | No. (%) of Occurrences in:   |                              | <i>p</i> value <sup>b</sup> |
|---------------------------|------------------------------|------------------------------|-----------------------------|
|                           | Early phase ( <i>n</i> = 52) | Late phase ( <i>n</i> = 283) |                             |
| 6K/R                      | 0(0)                         | 56(20)                       | <0.01                       |
| 7G/R                      | 0(0)                         | 38(13)                       | <0.01                       |
| 17G/E                     | 0(0)                         | 0(0)                         | -                           |
| 18V/I                     | 32(62)                       | 2(1)                         | <0.01                       |
| 22E/K                     | 31(60)                       | 34(12)                       | <0.01                       |
| 37K/R                     | 0(0)                         | 111(39)                      | <0.01                       |
| 39G/E                     | 50(96)                       | 35(12)                       | <0.01                       |
| 41T/I                     | 51(98)                       | 94(33)                       | <0.01                       |
| 51T/I                     | 50(96)                       | 69(24)                       | <0.01                       |
| 55Q/K                     | 50(96)                       | 140(49)                      | <0.01                       |

<sup>a</sup> Positions are those indicated by red denote in Figure 1; <sup>b</sup> Determined by the chi-square test of the SAS 9.2.
